# Supplementary material for: Clinical impact of ibrutinib plus R-CHOP in untreated DLBCL coexpressing BCL2 and MYC in the phase 3 PHOENIX trial
Source: PubMed Central journal article supplement — Blood Adv. 2023 Jan 31;7(10):2008–17. doi: 10.1182/bloodadvances.2022009389 (PMC10188634; doi:10.1182/bloodadvances.2022009389), 2023-01-31
Supplement: BLOODA_ADV-2022-009389-mmc1.pdf [file BLOODA_ADV-2022-009389-mmc1.pdf]

## **Supplementary Material**

Supplement to: P.W.M. Johnson, et al., Clinical impact of ibrutinib plus R-CHOP in untreated DLBCL co-expressing BCL2 and MYC in the phase 3 PHOENIX trial. *Blood Adv* (2023).

**Supplemental Table 1. Baseline demographic and clinical characteristics of patients included in this analysis.**

| Characteristics                                                  | High <i>BCL2</i> and <i>MYC</i> co-expression |                                |                  | No high <i>BCL2</i> and <i>MYC</i> co-expression |                                |                  | Overall population               |                                |                  |
|------------------------------------------------------------------|-----------------------------------------------|--------------------------------|------------------|--------------------------------------------------|--------------------------------|------------------|----------------------------------|--------------------------------|------------------|
|                                                                  | Ibrutinib +<br>R-CHOP<br>n = 123              | Placebo +<br>R-CHOP<br>n = 111 | Total<br>N = 234 | Ibrutinib +<br>R-CHOP<br>n = 263                 | Placebo +<br>R-CHOP<br>n = 269 | Total<br>N = 532 | Ibrutinib +<br>R-CHOP<br>n = 386 | Placebo +<br>R-CHOP<br>n = 380 | Total<br>N = 766 |
| Age, median (range)<br>years                                     | 63.0 (21-88)                                  | 61.0 (19-86)                   | 62.0 (19-88)     | 63.0 (19-84)                                     | 61.0 (19-87)                   | 62.0 (19-87)     | 63.0 (19-88)                     | 61.0 (19-87)                   | 62.0 (19-88)     |
| <60 years, n (%)                                                 | 47 (38.2)                                     | 50 (45.0)                      | 97 (41.5)        | 102 (38.8)                                       | 118 (43.9)                     | 220 (41.4)       | 149 (38.6)                       | 168 (44.2)                     | 317 (41.4)       |
| ≥60 years, n (%)                                                 | 76 (61.8)                                     | 61 (55.0)                      | 137 (58.5)       | 161 (61.2)                                       | 151 (56.1)                     | 312 (58.6)       | 237 (61.4)                       | 212 (55.8)                     | 449 (58.6)       |
| Male, n (%)                                                      | 62 (50.4)                                     | 61 (55.0)                      | 123 (52.6)       | 140 (53.2)                                       | 148 (55.0)                     | 288 (54.1)       | 202 (52.3)                       | 209 (55.0)                     | 411 (53.7)       |
| Time from diagnosis to<br>randomization, median<br>(range), days | 26 (6-302)                                    | 26 (9-223)                     | 26 (6-302)       | 27 (4-266)                                       | 27 (6-349)                     | 27 (4-349)       | 27 (4-302)                       | 26 (6-349)                     | 26 (4-349)       |
| Ann Arbor stage, n (%)                                           |                                               |                                |                  |                                                  |                                |                  |                                  |                                |                  |
| I-II                                                             | 29 (23.6)                                     | 28 (25.2)                      | 57 (24.4)        | 64 (24.3)                                        | 61 (22.7)                      | 125 (23.5)       | 93 (24.1)                        | 89 (23.4)                      | 182 (23.8)       |
| III-IV                                                           | 94 (76.4)                                     | 83 (74.8)                      | 177 (75.6)       | 199 (75.7)                                       | 208 (77.3)                     | 407 (76.5)       | 293 (75.9)                       | 291 (76.6)                     | 584 (76.2)       |
| Bulky tumor (long axis ≥10 cm), n (%)                            |                                               |                                |                  |                                                  |                                |                  |                                  |                                |                  |
| Yes                                                              | 14 (11.4)                                     | 16 (14.4)                      | 30 (12.8)        | 40 (15.2)                                        | 37 (13.8)                      | 77 (14.5)        | 54 (14.0)                        | 53 (13.9)                      | 107 (14.0)       |
| No                                                               | 109 (88.6)                                    | 95 (85.6)                      | 204 (87.2)       | 223 (84.8)                                       | 232 (86.2)                     | 455 (85.5)       | 332 (86.0)                       | 327 (86.1)                     | 659 (86.0)       |
| Extra nodal sites ≥1, n (%)                                      |                                               |                                |                  |                                                  |                                |                  |                                  |                                |                  |
| Yes                                                              | 82 (66.7)                                     | 73 (65.8)                      | 155 (66.2)       | 179 (68.1)                                       | 194 (72.1)                     | 373 (70.1)       | 261 (67.6)                       | 267 (70.3)                     | 528 (68.9)       |
| No                                                               | 41 (33.3)                                     | 38 (34.2)                      | 79 (33.8)        | 84 (31.9)                                        | 75 (27.9)                      | 159 (29.9)       | 125 (32.4)                       | 113 (29.7)                     | 238 (31.1)       |
| ECOG PS, n (%)                                                   |                                               |                                |                  |                                                  |                                |                  |                                  |                                |                  |
| 0-1                                                              | 115 (93.5)                                    | 91 (82.0)                      | 206 (88.0)       | 236 (89.7)                                       | 232 (86.2)                     | 468 (88.0)       | 351 (90.9)                       | 323 (85.0)                     | 674 (88.0)       |
| ≥2                                                               | 8 (6.5)                                       | 20 (18.0)                      | 28 (12.0)        | 27 (10.3)                                        | 37 (13.8)                      | 64 (12.0)        | 35 (9.1)                         | 57 (15.0)                      | 92 (12.0)        |
| R-IPI risk group,* n (%)                                         |                                               |                                |                  |                                                  |                                |                  |                                  |                                |                  |
| Low (1-2)                                                        | 72 (58.5)                                     | 65 (58.6)                      | 137 (58.5)       | 146 (55.5)                                       | 147 (54.6)                     | 293 (55.1)       | 218 (56.5)                       | 212 (55.8)                     | 430 (56.1)       |
| High (3-5)                                                       | 51 (41.5)                                     | 46 (41.4)                      | 97 (41.5)        | 117 (44.5)                                       | 122 (45.4)                     | 239 (44.9)       | 168 (43.5)                       | 168 (44.2)                     | 336 (43.9)       |
| Elevated LDH, n (%)                                              |                                               |                                |                  |                                                  |                                |                  |                                  |                                |                  |
| Yes                                                              | 72 (58.5)                                     | 62 (55.9)                      | 134 (57.3)       | 141 (53.6)                                       | 143 (53.2)                     | 284 (53.4)       | 213 (55.2)                       | 205 (53.9)                     | 418 (54.6)       |
| No                                                               | 51 (41.5)                                     | 46 (41.4)                      | 100 (42.7)       | 122 (46.4)                                       | 126 (46.8)                     | 248 (46.6)       | 173 (44.8)                       | 175 (46.1)                     | 348 (45.4)       |

\*R-IPI risk group based on clinical database.

ECOG PS, Eastern Cooperative Oncology Group performance status; LDH, lactate dehydrogenase; R-CHOP, rituximab, cyclophosphamide, doxorubicin, vincristine, and prednisone; R-IPI, Revised International Prognostic Index.

**Supplemental Table 2. Summary of response by DE status.**

| Treatment             | DE status             | Response, n (%)   |                  |                |                |                |                 |
|-----------------------|-----------------------|-------------------|------------------|----------------|----------------|----------------|-----------------|
|                       |                       | CR                | PR               | SD             | PD             | NE             | NA              |
| Ibrutinib +<br>R-CHOP | DE, n = 123           | 83 (67.5)         | 28 (22.8)        | 1 (0.8)        | 1 (0.8)        | 1 (0.8)        | 9 (7.3)         |
|                       | Non-DE, n = 263       | 174 (66.2)        | 58 (22.1)        | 0 (0.0)        | 8 (3.0)        | 0 (0.0)        | 23 (8.7)        |
|                       | <b>Total, n = 386</b> | <b>257 (66.6)</b> | <b>86 (22.3)</b> | <b>1 (0.3)</b> | <b>9 (2.3)</b> | <b>1 (0.3)</b> | <b>32 (8.3)</b> |
| Placebo +<br>R-CHOP   | DE, n = 111           | 72 (64.9)         | 31 (27.9)        | 1 (0.9)        | 4 (3.6)        | 1 (0.9)        | 2 (1.8)         |
|                       | Non-DE, n = 269       | 184 (68.4)        | 66 (24.5)        | 2 (0.7)        | 4 (1.5)        | 0 (0.0)        | 13 (4.8)        |
|                       | <b>Total, n = 380</b> | <b>256 (67.4)</b> | <b>97 (25.5)</b> | <b>3 (0.8)</b> | <b>8 (2.1)</b> | <b>1 (0.3)</b> | <b>15 (3.9)</b> |

CR, complete response; DE, *BCL2/MYC* double-expressor lymphoma by RNA sequencing; GEP, gene expression profiling; NA, not assessed; NE, non-evaluable; PD, progressive disease; PR, partial response; R-CHOP, rituximab, cyclophosphamide, doxorubicin, vincristine, and prednisone; SD, stable disease.

**Supplemental Table 3. Proportion of patients with DE lymphoma in the DLBCL subtypes\*†**

|                                        |                                  | DE calls (RNA-seq) |               |
|----------------------------------------|----------------------------------|--------------------|---------------|
|                                        |                                  | DE, n (%)          | Non-DE, n (%) |
| <b>ABC calls<br/>(HTG EdgeSeq)</b>     | <b>ABC, n = 540</b>              | 193 (35.7)         | 347 (64.3)    |
|                                        | <b>GCB/Unclassified, n = 165</b> | 24 (14.5)          | 141 (85.5)    |
| <b>MCD/N1/BN2 calls<br/>(LymphGen)</b> | <b>MCD, n = 109</b>              | 48 (44.0)          | 61 (56.0)     |
|                                        | <b>Non-MCD, n = 656</b>          | 186 (28.4)         | 470 (71.6)    |
|                                        | <b>N1, n = 28</b>                | 11 (39.2)          | 17 (60.8)     |
|                                        | <b>Non-N1, n = 737</b>           | 223 (30.3)         | 514 (69.7)    |
|                                        | <b>BN2, n = 46</b>               | 10 (21.7)          | 36 (78.3)     |
|                                        | <b>Non-BN2, n = 719</b>          | 224 (31.2)         | 495 (68.8)    |

\*A53 subtype could not be inferred as assessing aneuploidy was not allowed by methods employed in the analysis.

†Patient counts by assay – total: 838 patients; LymphGen (MCD/N1/BN2 calls): 773 patients; RNA-seq (DE calls): 766 patients; HTG EdgeSeq (ABC calls): 747 patients; RNA-seq/LymphGen overlap: 765 patients; HTG EdgeSeq/LymphGen overlap: 709 patients; RNA-seq/HTG EdgeSeq overlap: 705 patients; overlap of all three assays: 704 patients.

A53, aneuploid with *TP53* inactivation; ABC, activated B-cell-like; BN2, *BCL6* fusion and *NOTCH2* mutation; DE, *BCL2/MYC* double-expressor lymphoma by RNA sequencing; GCB, germinal center B-cell-like; MCD, *MYD88*<sup>L265P</sup>/*CD79B*-mutated; N1, *NOTCH1*-mutated; RNA-seq, RNA sequencing.

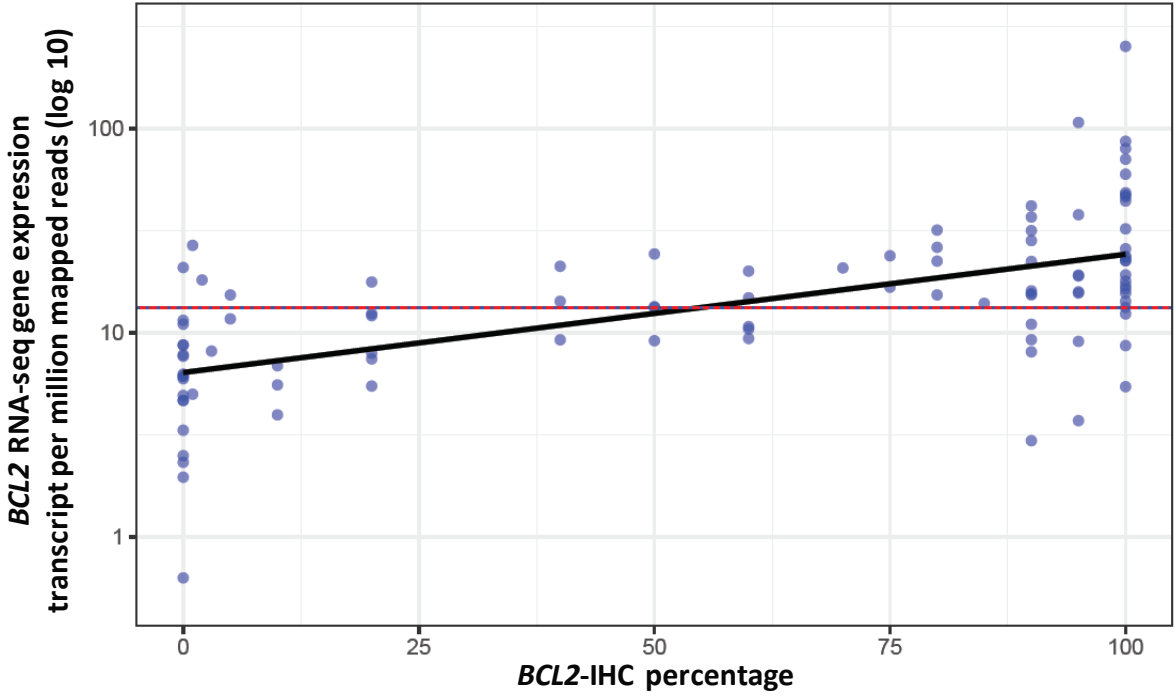

**Supplementary Figure 1. *BCL2* expression cutoff.** Colored lines represent the optimal *BCL2* RNA-seq-based cutoff for approximating calls from IHC *BCL2* 50% (dotted blue line) and the median *BCL2* RNA-seq expression value for the full study (solid red line). IHC, immunohistochemistry; RNA-seq, RNA sequencing.

### High *MYC* and low *BCL2* expression

**A. EFS**

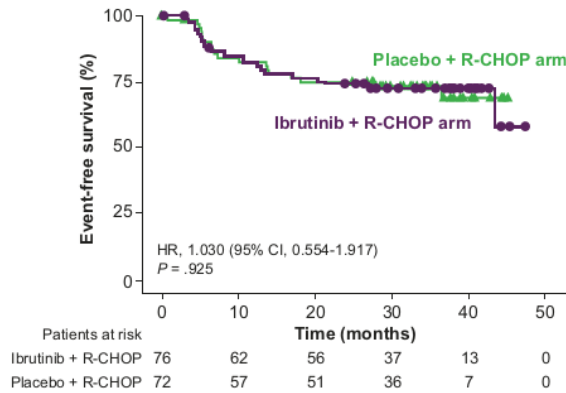

**B. OS**

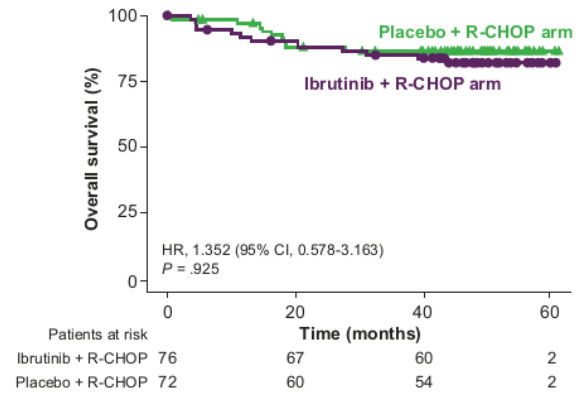

### Low *MYC* and high *BCL2* expression

**C. EFS**

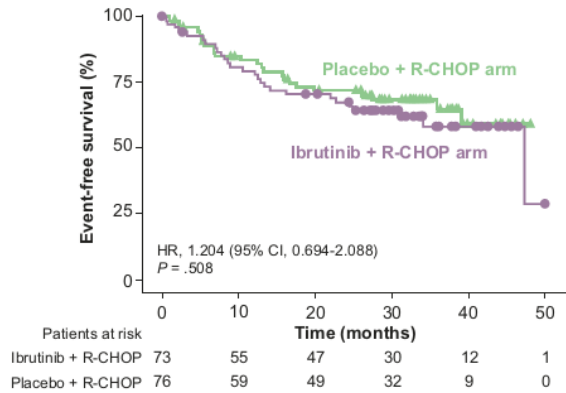

**D. OS**

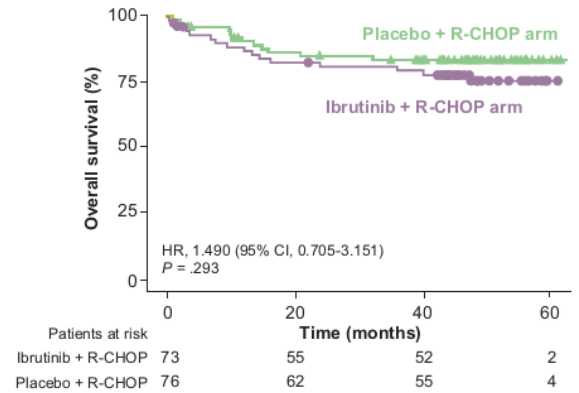

**Supplementary Figure 2.** EFS and OS in patients with high *MYC* and low *BCL2* expression (A, B), and low *MYC* and high *BCL2* expression (C, D) by RNA-seq in the ibrutinib plus R-CHOP vs placebo plus R-CHOP. CI, confidence interval; EFS, event-free survival; HR, hazard ratio; ITT, intent-to-treat; OS, overall survival; R-CHOP, rituximab, cyclophosphamide, doxorubicin, vincristine, and prednisone; RNA-seq; RNA sequencing.
